# Supplementary material for: Optimizing Georgia’s Public Health Workforce: A Study on Demographics, Engagement, and Capacity Building
Source: Research Square preprint supplement (doi:10.21203/rs.3.rs-7041629/v1), 2025-08-19
Supplement: Supplementary file 2 [file 72e2b53c9f2a77a2acafcc2c.docx]

Response rate from Municipal Public Health Centers

| **MPHC Region** | **Survey Target Group as per HRIS data (Feb 2023)** | **Survey Responses** | **Response Rate** |
| --- | --- | --- | --- |
| Adjara | 33 | 28 | 84.8% |
| Guria | 34 | 34 | 100.0% |
| Imereti | 153 | 132 | 86.2% |
| Kakheti | 85 | 73 | 85.9% |
| KvemoKartli | 91 | 63 | 69.2% |
| Mtskheta-tianeti | 47 | 40 | 85.1% |
| Racha/kvemoSvaneti | 31 | 30 | 96.8% |
| Samegrelo/ZemoSvaneti | 115 | 104 | 90.4% |
| Samtskhe-Javakheti | 56 | 54 | 96.4% |
| ShidaKartli | 47 | 47 | 100.0% |
| Tbilisi | 42 | 37 | 88.1% |
|  | 734 | 642 | 87.5% |
