# Supplementary material for: Optimizing Georgia’s Public Health Workforce: A Study on Demographics, Engagement, and Capacity Building
Source: Research Square preprint supplement (doi:10.21203/rs.3.rs-7041629/v1), 2025-08-19
Supplement: Supplementary file 3 [file bc611ada007b2c652a001821.docx]

Response rate from NCDC and Regional NCDC offices

| **NCDC Departments/Divisions** | **Survey Target Group as per HRIS data (Feb 2023** | **Responses Received** | **Response Rate** |
| --- | --- | --- | --- |
| **Administrative Department** | 5 | 5 | 100.0% |
| **Lugar Public Health Research Center** (Leadership positions at the center level) | 3 | 2 | 66.7% |
| **Department of Biosafety and Particularly Dangerous Pathogens** | 41 | 23 | 56.1% |
| **Department of Virology, Molecular Biology and Genome** | 27 | 23 | 85.2% |
| **Department of Environmental Health** | 6 | 6 | 100.0% |
| **Department of Infectious/Communicable Diseases** | 39 | 32 | 82.1% |
| **Department of Medical Statistics** | 19 | 17 | 89.5% |
| **Department of Non-Communicable Diseases** | 22 | 15 | 68.2% |
| **Financial and Economic Department** | 16 | 13 | 81.3% |
| **Department of Public Health State Programs and Regional Management** |  |  |  |
| State Programs | 112 | 38 | 33.9% |
| Regional offices | 87 | 85 | 97.7% |
| **Divisions under the Director General** |  |  |  |
| International and Public Relations Division | 5 | 5 | 100.0% |
| Division of Continuing Professional Training and Development | 2 | 2 | 100.0% |
| Public Health Risk Preparedness and Response Division | 3 | 3 | 100.0% |
| Quality Control Division | 3 | 3 | 100.0% |
| Grand Total | 390 | 272 | 69.7% |
