# Supplementary figures and images for: Optimizing Georgia’s Public Health Workforce: A Study on Demographics, Engagement, and Capacity Building
Source: Research Square preprint supplement (doi:10.21203/rs.3.rs-7041629/v1), 2025-08-19

NCDC Organogram


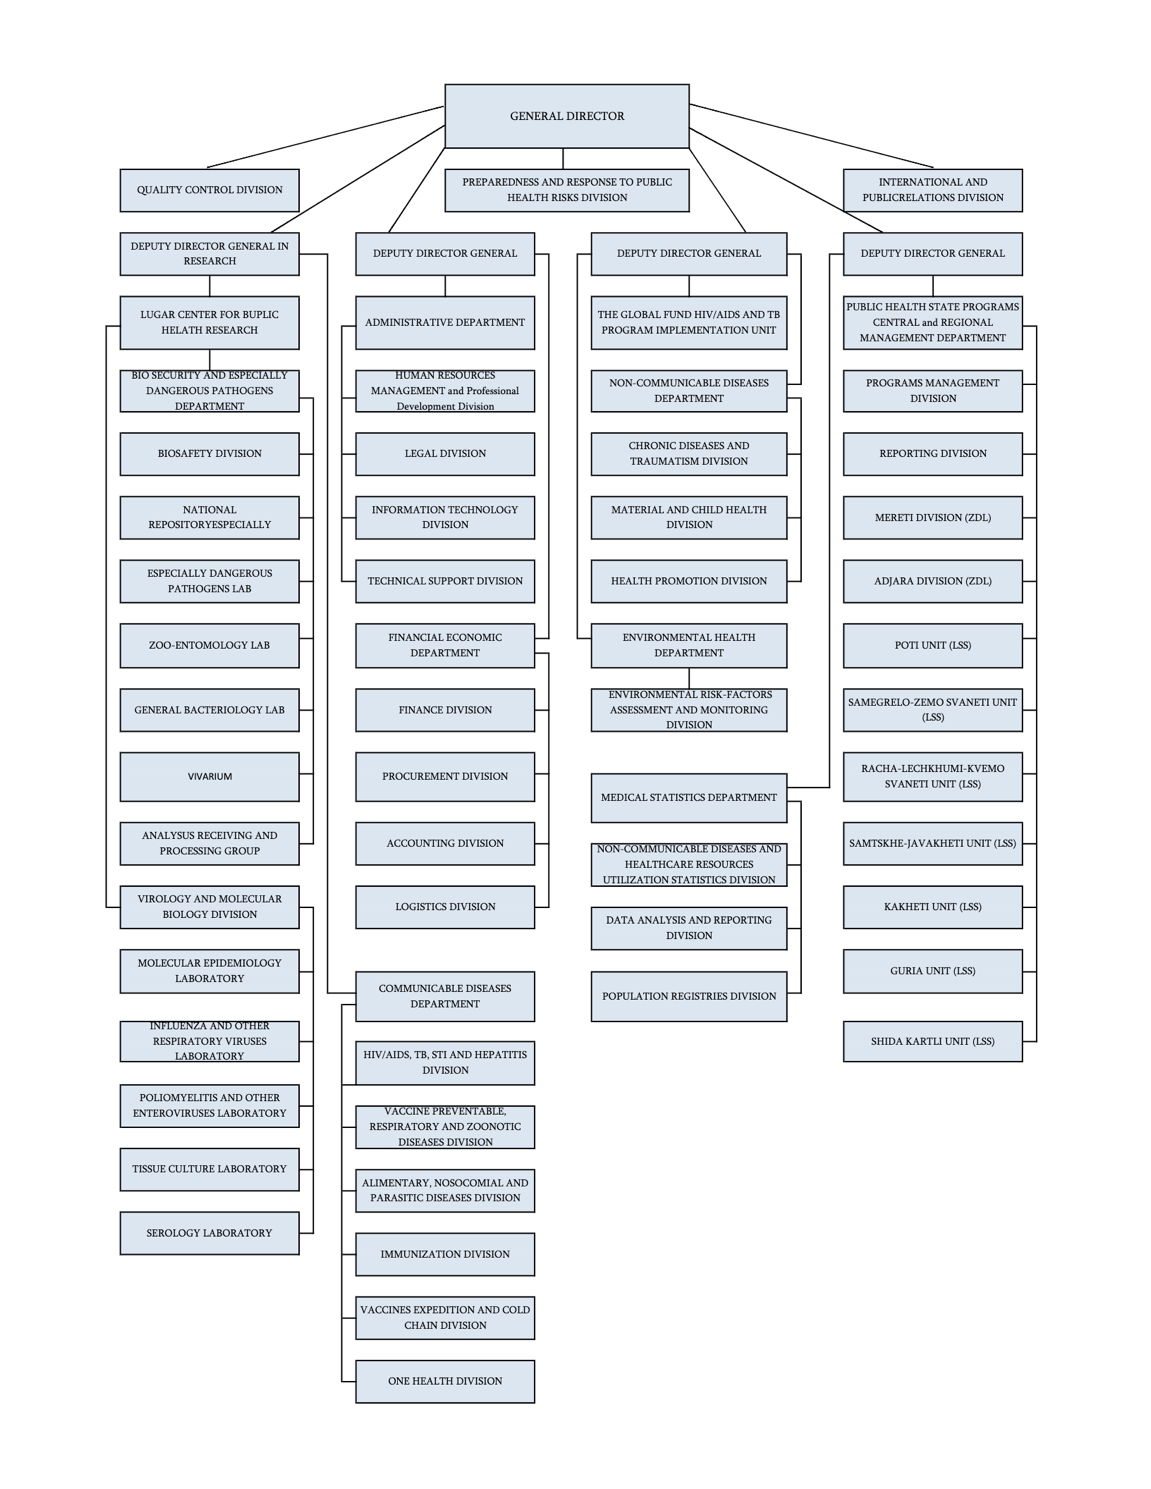

Supplement: Supplementary file 1 [file 51aa96d2a4b9d6ac2160e030.docx]
